# Supplementary material for: A novel immunomodulating peptide with potential to complement oligodeoxynucleotide-mediated adjuvanticity in vaccination strategies
Source: PubMed Central journal article supplement — Sci Rep. 2024 Nov 5;14:26737. doi: 10.1038/s41598-024-78150-7 (PMC11538426; doi:10.1038/s41598-024-78150-7), 2024-11-05
Supplement: 41598_2024_78150_MOESM1_ESM.pdf [file 41598_2024_78150_MOESM1_ESM.pdf]

# A novel immunomodulating peptide with potential to complement oligodeoxynucleotide-mediated adjuvanticity in vaccination strategies

Michael Agrez<sup>1,4\*</sup>, Christopher Chandler<sup>2</sup>, Kristofer J. Thurecht<sup>3,4</sup>, Nicholas L. Fletcher<sup>3,4</sup>, Feifei Liu<sup>3,4</sup>, Gayathri Subramaniam<sup>3,4</sup>, Christopher B. Howard<sup>3,4</sup>, Stephen Parker<sup>1</sup>, Darryl Turner<sup>5</sup>, Justyna Rzepecka<sup>5</sup>, Gavin Knox<sup>5</sup>, Anastasia Nika<sup>5</sup>, Andrew M. Hall<sup>5</sup>, Hayley Gooding<sup>5</sup> & Laura Gallagher<sup>6</sup>

<sup>1</sup>InterK Peptide Therapeutics Limited, New South Wales, Australia. <sup>2</sup>Auspep Pty Limited, Melbourne, Australia. <sup>3</sup>Centre for Advanced Imaging, University of Queensland, Australia. <sup>4</sup>Australian Institute for Bioengineering and Nanotechnology and the ARC Training Centre for Innovation in Biomedical Imaging Technologies, University of Queensland, Australia. <sup>5</sup>Concept Life Sciences, Edinburgh, Scotland. <sup>6</sup>Affiliated with Concept Sciences at the time of research.

## Supplementary information

**Figure S1:** Refers to manuscript **Figure 1a and 1b**  
CD14<sup>+</sup>/CD14<sup>neg</sup> (Monocyte-derived Dendritic Cells)

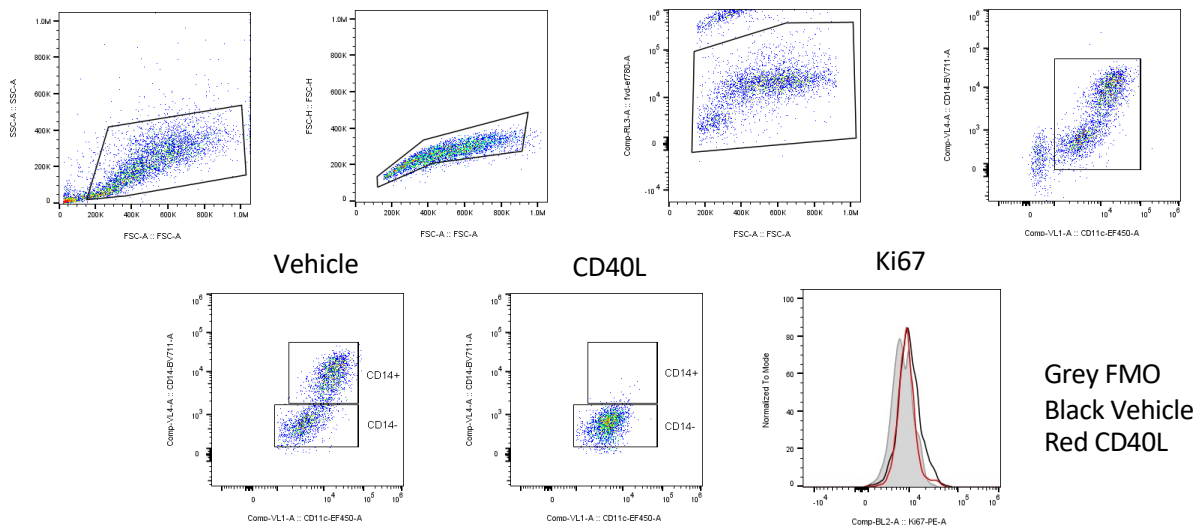

Debris and multicellular events were excluded, then viable (live) cells gated and CD11c<sup>+</sup> cells identified. Within the CD11c<sup>+</sup> population, CD14<sup>+</sup> and CD14<sup>neg</sup> cell populations were identified.

**Figure S2:** Refers to manuscript **Figure 1c and 1d**  
CD14<sup>+</sup>/CD14<sup>neg</sup> (Monocyte-derived Dendritic Cells)

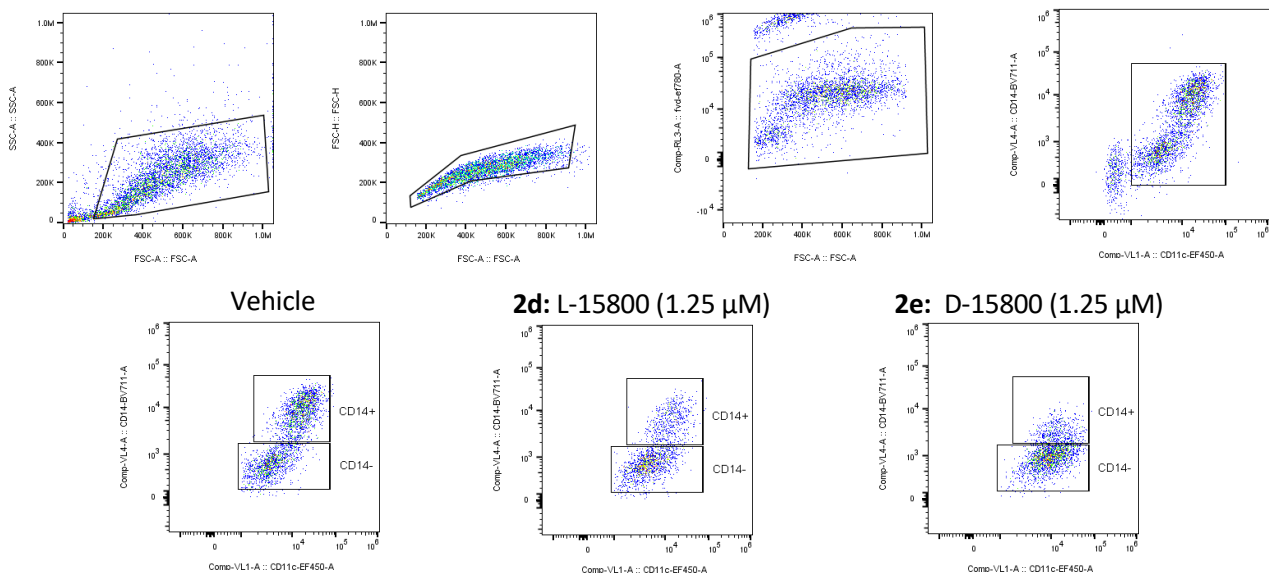

Debris and multicellular events were excluded, then viable (live) cells gated and CD11c<sup>+</sup> cells identified. Within the CD11c<sup>+</sup> population, CD14<sup>+</sup> and CD14<sup>neg</sup> cell populations were identified.

**Figure S3:** Refers to manuscript **Figure 1e**  
 Ki67 (Monocyte-derived Dendritic Cells)

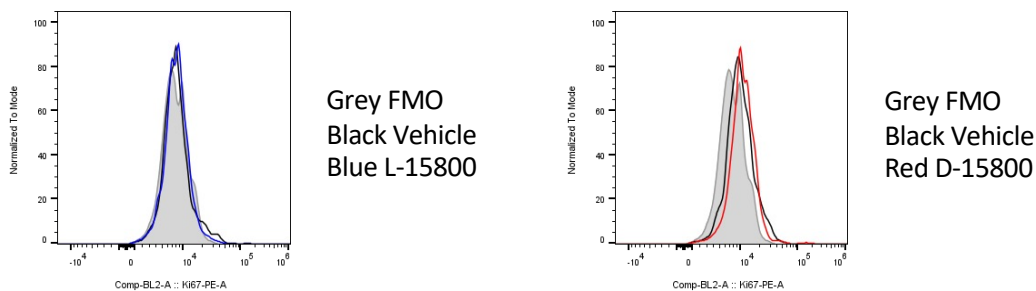

**Figure S4:** Refers to manuscript **Figure 2c and 2d**  
 Ki67 (Unstimulated human PBMC cultures: CD4<sup>+</sup> T cells)

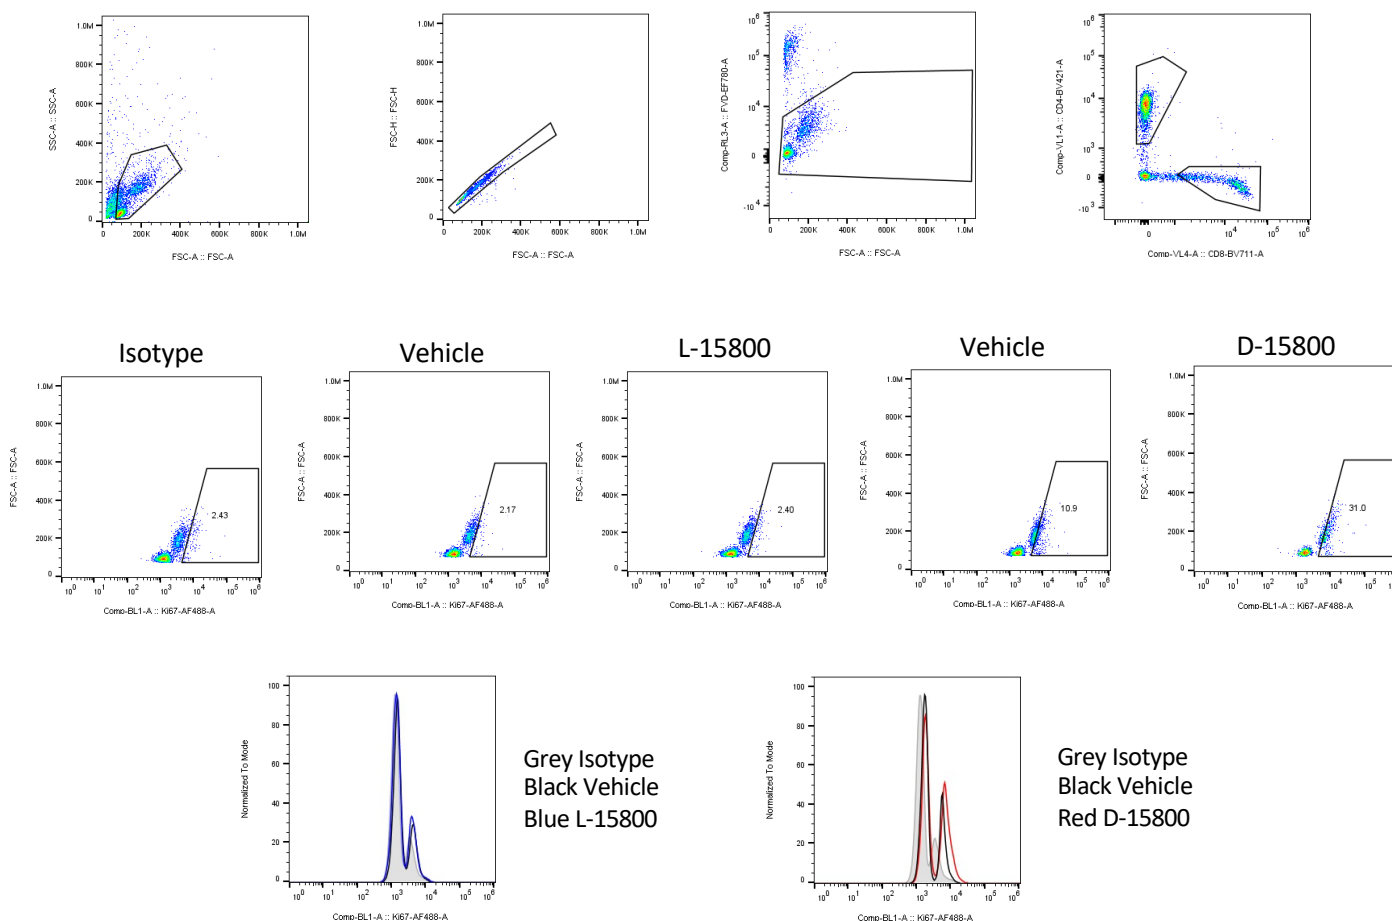

Debris and multicellular events were excluded, then viable (live) cells gated. CD4<sup>+</sup> cells selected for analysis of Ki67. L-1580 and D-1580 treatment groups were cultured across different plates, with vehicle control groups included on each plate.

**Figure S5:** Refers to manuscript **Figure 2e and 2f**  
 CD25 (Unstimulated human PBMC cultures: CD4<sup>+</sup> T cells)

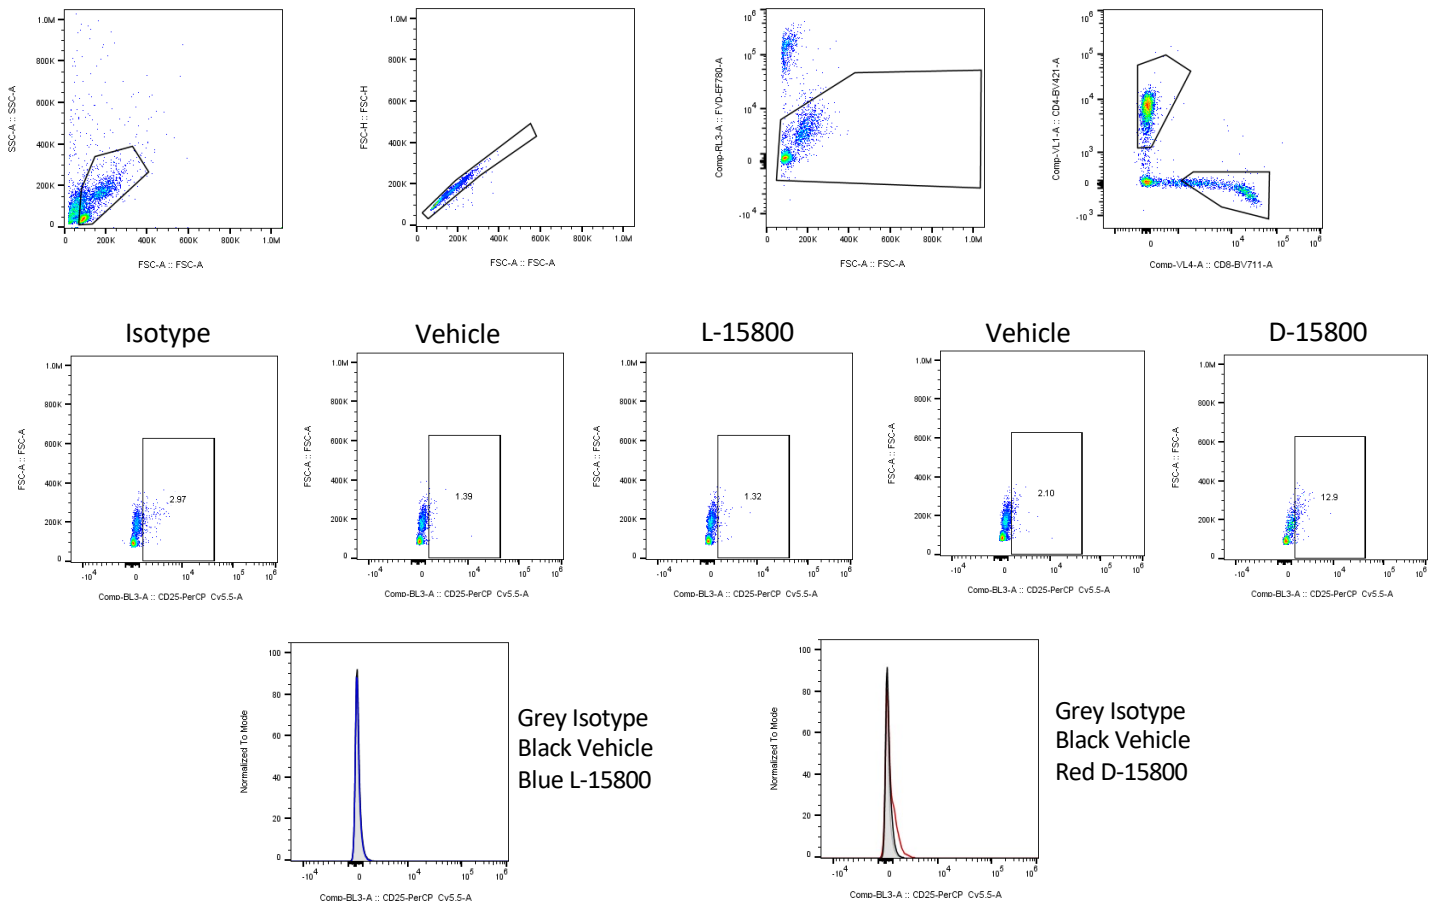

Debris and multicellular events were excluded, then viable (live) cells gated. CD4<sup>+</sup> cells selected for analysis of CD25. L-15800 and D-15800 treatment groups were cultured across different plates, with vehicle control groups included on each plate.

**Figure S6:** Refers to manuscript **Figure 2g – 2j**  
 Ki67 and CD25 (Unstimulated human PBMC cultures: CD3<sup>neg</sup> CD56<sup>+</sup> cells)

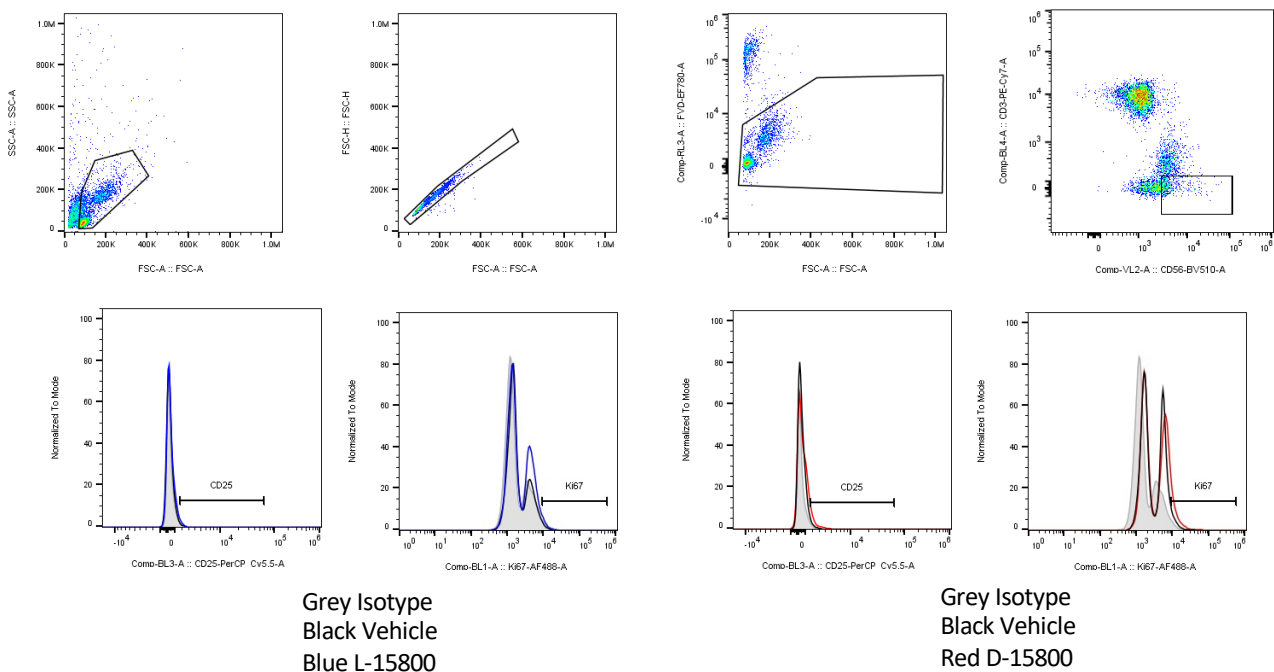

Debris and multicellular events were excluded, then viable (live) cells gated. CD3<sup>neg</sup> CD56<sup>+</sup> cells selected for analysis of Ki67 and CD25.

**Figure S7:** Refers to manuscript **Figure 2k and 2l**  
 CD40L (Unstimulated human PBMC cultures: CD4<sup>+</sup> T cells)

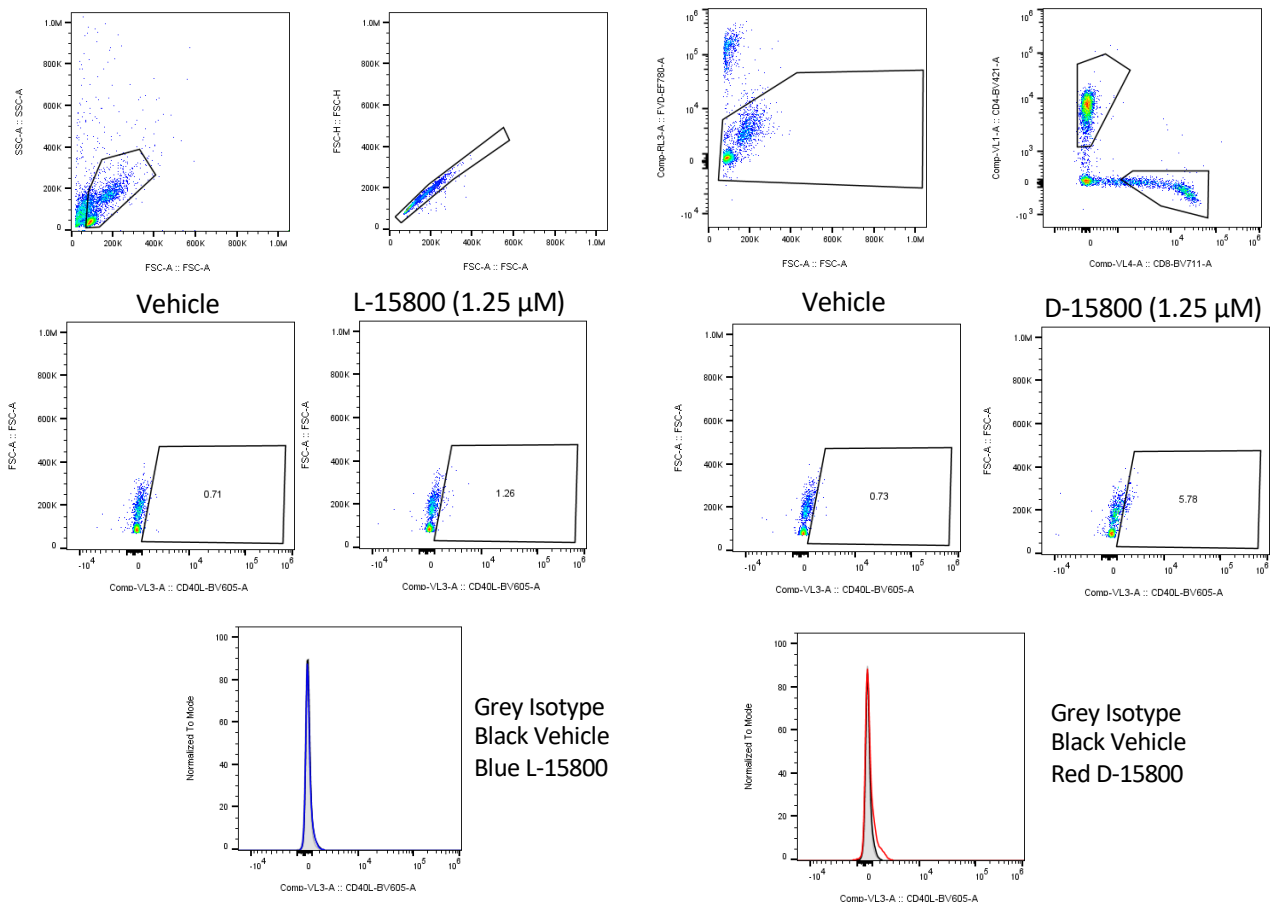

Debris and multicellular events were excluded, then viable (live) cells gated and CD4<sup>+</sup> cells selected for analysis of CD40L. L-15800 and D-15800 treatment groups were cultured across different plates, with vehicle control groups included on each plate.

**Figure S8:** Refers to manuscript **Figure 2m**  
 CD40L (Stimulated human PBMC cultures: CD4<sup>+</sup> T cells)

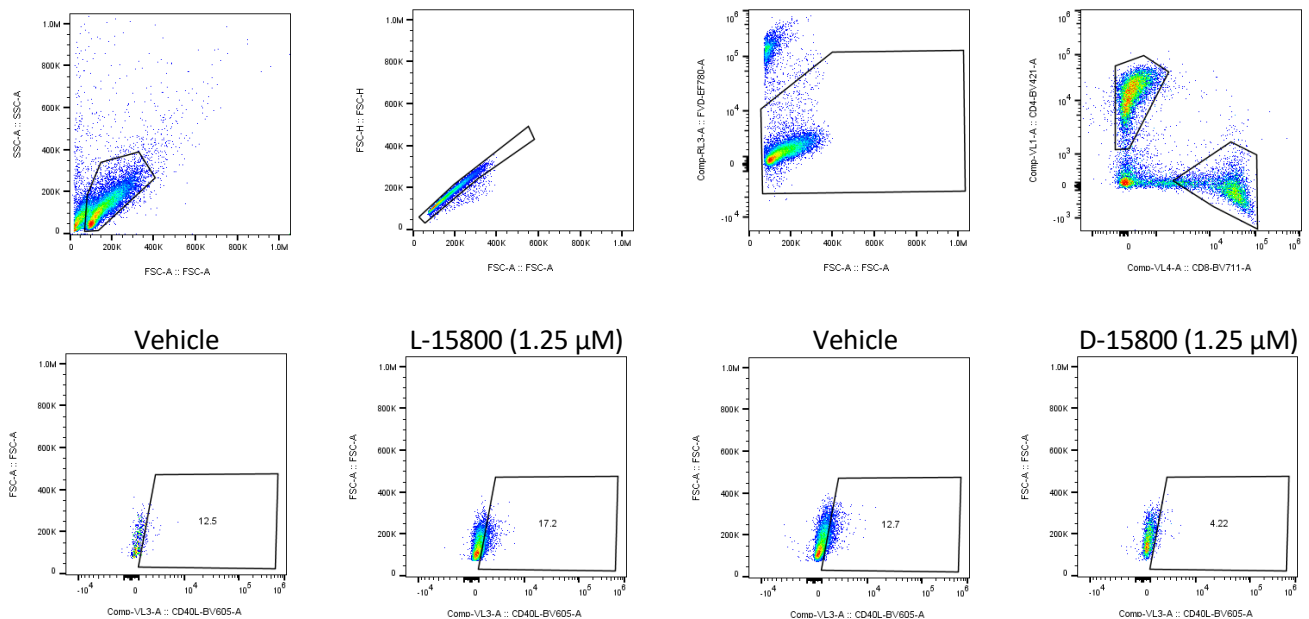

Debris and multicellular events were excluded, then viable (live) cells gated. CD4<sup>+</sup> T cells selected for analysis of CD40L. L-15800 and D-15800 treatment groups were cultured across different plates, with vehicle control groups included on each plate.

**Figure S9:** Refers to manuscript **Figure 2n**  
 CD40L (Unstimulated human PBMC cultures: CD3<sup>neg</sup> CD56<sup>+</sup> cells)

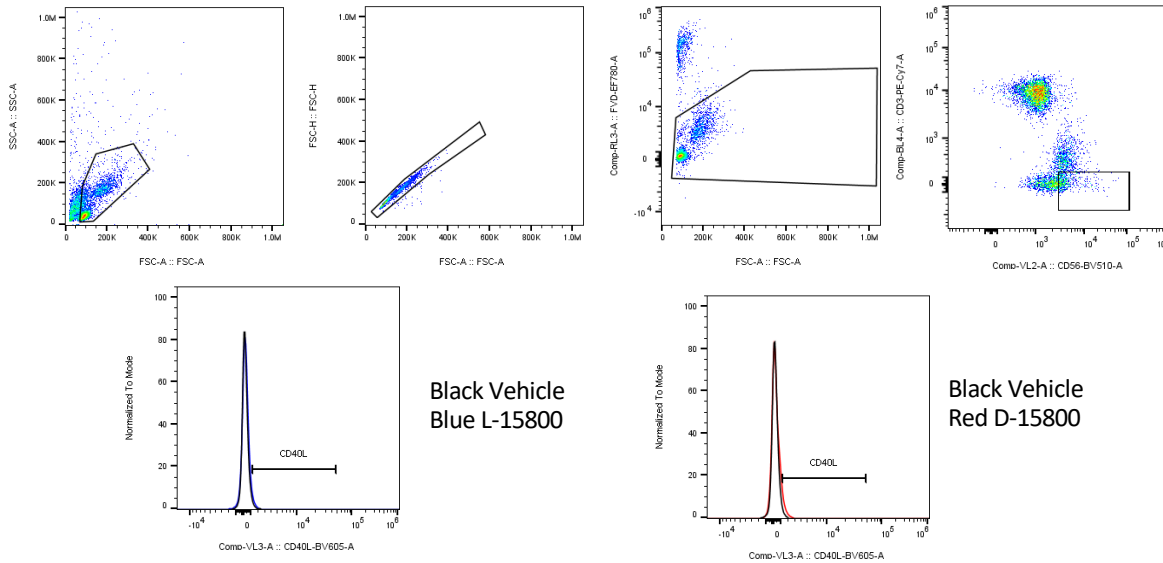

Debris and multicellular events were excluded, then viable (live) cells gated and CD3<sup>neg</sup>CD56<sup>+</sup> cells selected for analysis of CD40L. L-15800 and D-15800 treatment groups were cultured across different plates, with vehicle control groups included on each plate.

**Figure S10:** Refers to manuscript **Figure 3b**  
 Cell viability (unstimulated PBMCs)

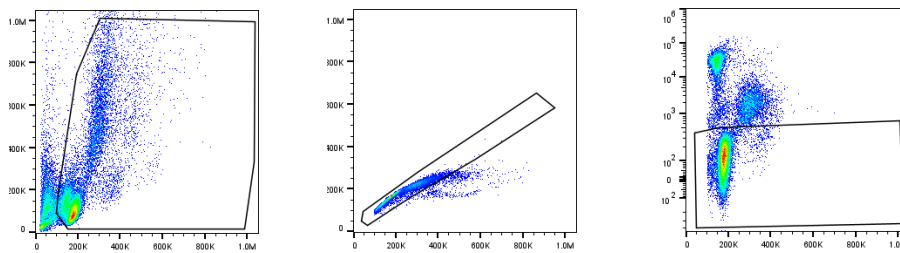

Debris and multicellular events were excluded, then viable (live) cells gated.

**Figure S11:** Refers to manuscript **Figure 4a and Figures 4e - 4h**  
 Cell viability and IgM<sup>+</sup> (Isolated CD19<sup>+</sup> expressing B cells)

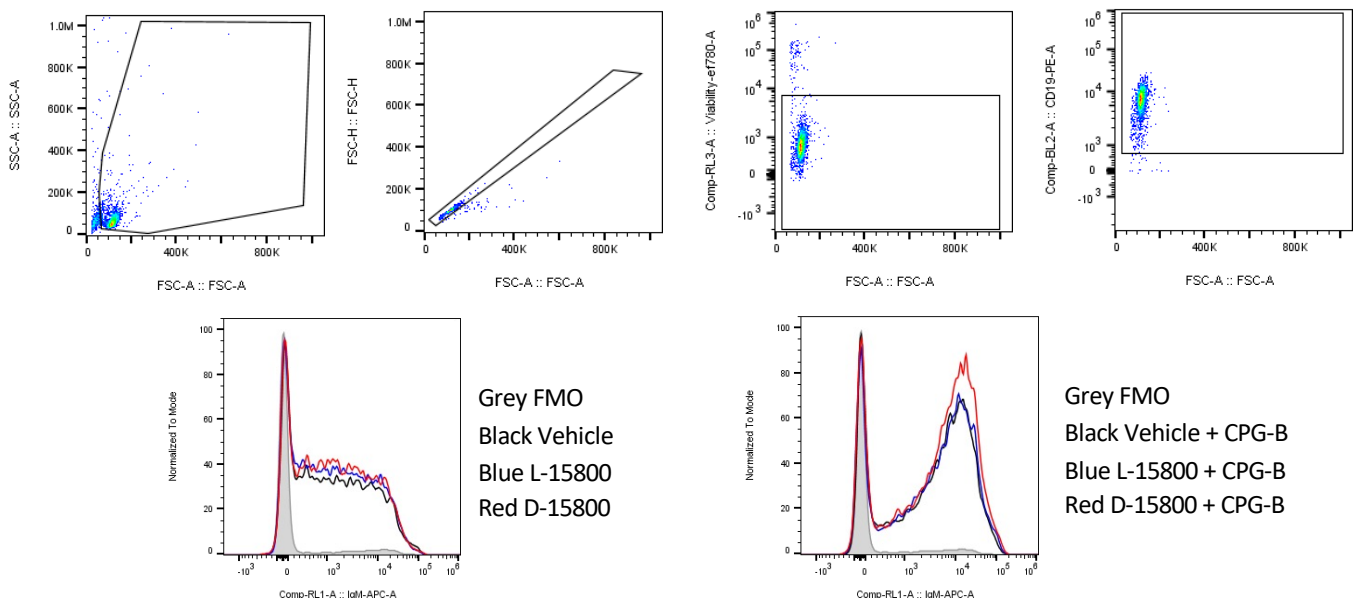

Debris and multicellular events were excluded, viable (live) cells selected and CD19<sup>+</sup> cells identified for analysis of IgM expression.

**Figure S12** – Refers to manuscript **Figure 5a and 5b**:

Elution profile of 15800 peptide isomers and sera from a Phenomenex™ Jupiter 5 μm, C4, 300Å column

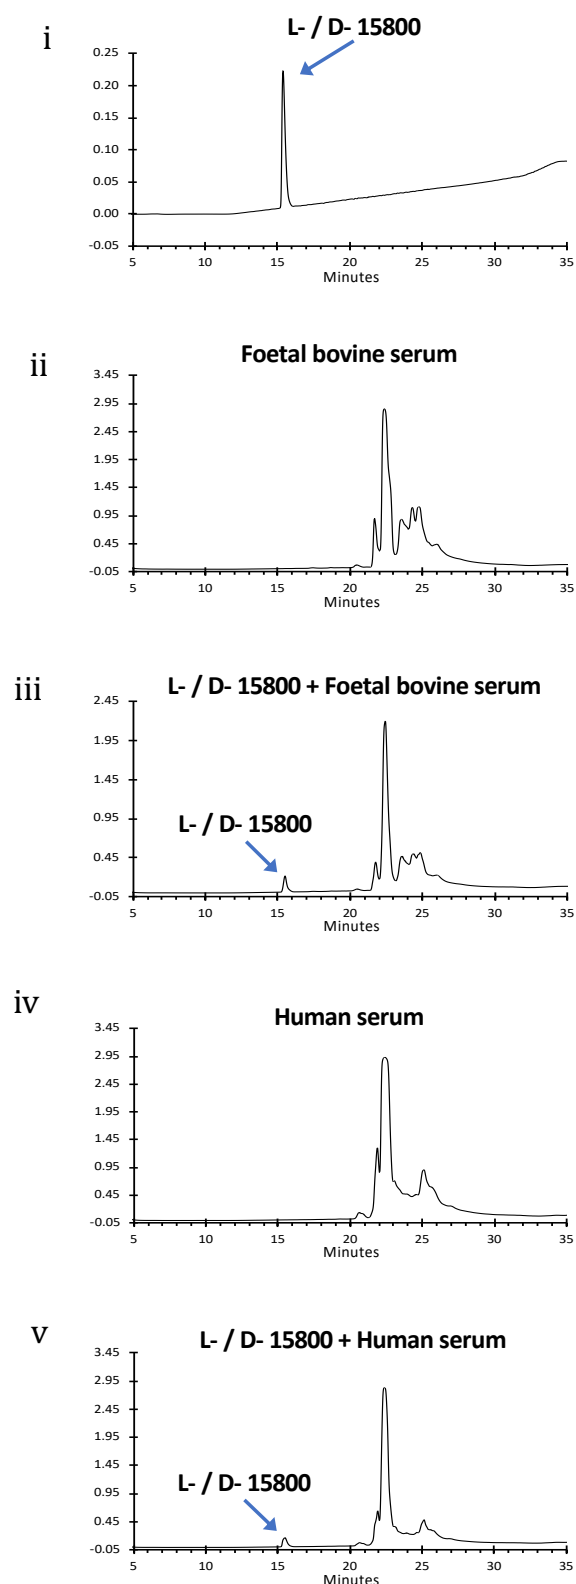

The percentage and rate of degradation of the L-15800 and D-15800 peptide isomers in both human serum (HS) and foetal bovine serum (FBS) at 37°C over 48 hours were determined by area under the curve (AUC) analysis of the integrated peak area observed at T=0 with those observed at the T=1, 4, 24 & 48 h time points.

**i**, Elution profile of L- / D- 15800 peptide isomers. **ii**, Elution profile of FBS. **iii**, Elution profile of L- / D- 15800 peptide isomers combined with FBS. **iv**, Elution profile of HS. **v**, Elution profile of L- / D- 15800 peptide isomers combined with HS.
